# Supplementary material for: OutCyte: a novel tool for predicting unconventional protein secretion
Source: PubMed Central journal article supplement (PMC6923414; doi:10.1038/s41598-019-55351-z), 2019-12-19
Supplement: 41598_2019_55351_MOESM1_ESM.pdf [file 41598_2019_55351_MOESM1_ESM.pdf]

# OutCyte: a novel tool for predicting unconventional protein secretion-

## Supplementary information

Linlin Zhao<sup>1,2</sup>, Gereon Poschmann<sup>1</sup>, Daniel Waldera-Lupa<sup>1</sup>, Nima Rafiee<sup>2</sup>, Markus Kollmann<sup>2</sup>, Kai Stühler<sup>1,3</sup>\*

<sup>1</sup>Institute of Molecular Medicine, Medical Faculty, Heinrich-Heine-University, Düsseldorf, Germany

<sup>2</sup>Mathematical Modelling of Biological Systems, Heinrich-Heine-University, Düsseldorf, Germany

<sup>3</sup> Molecular Proteomics Laboratory, BMFZ, Heinrich-Heine-University, Düsseldorf, Germany

\*Correspondence: [kai.stuehler@hhu.de](mailto:kai.stuehler@hhu.de) (K. Stühler)

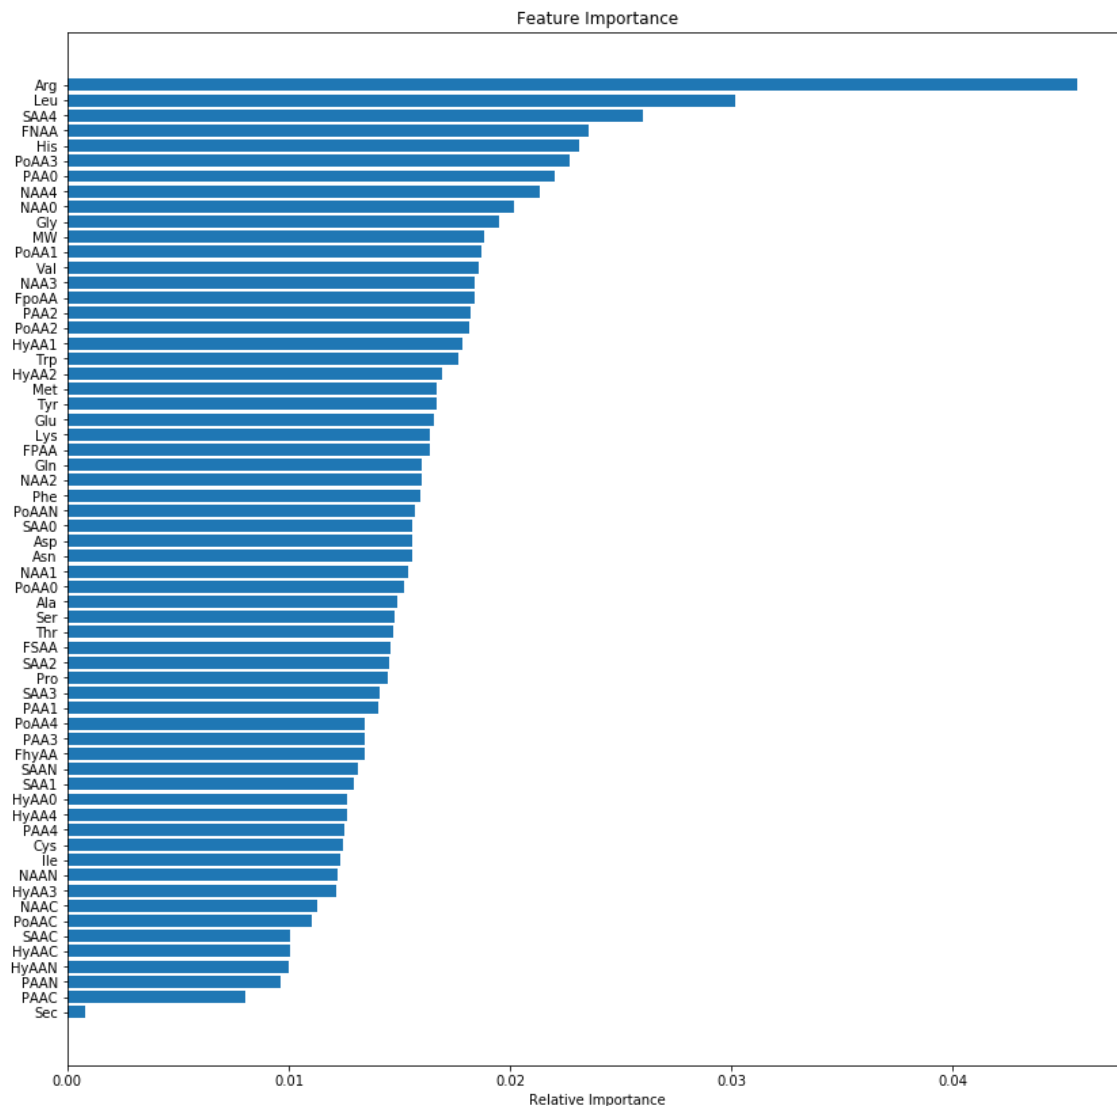

Fig. S1 Feature importance ranking

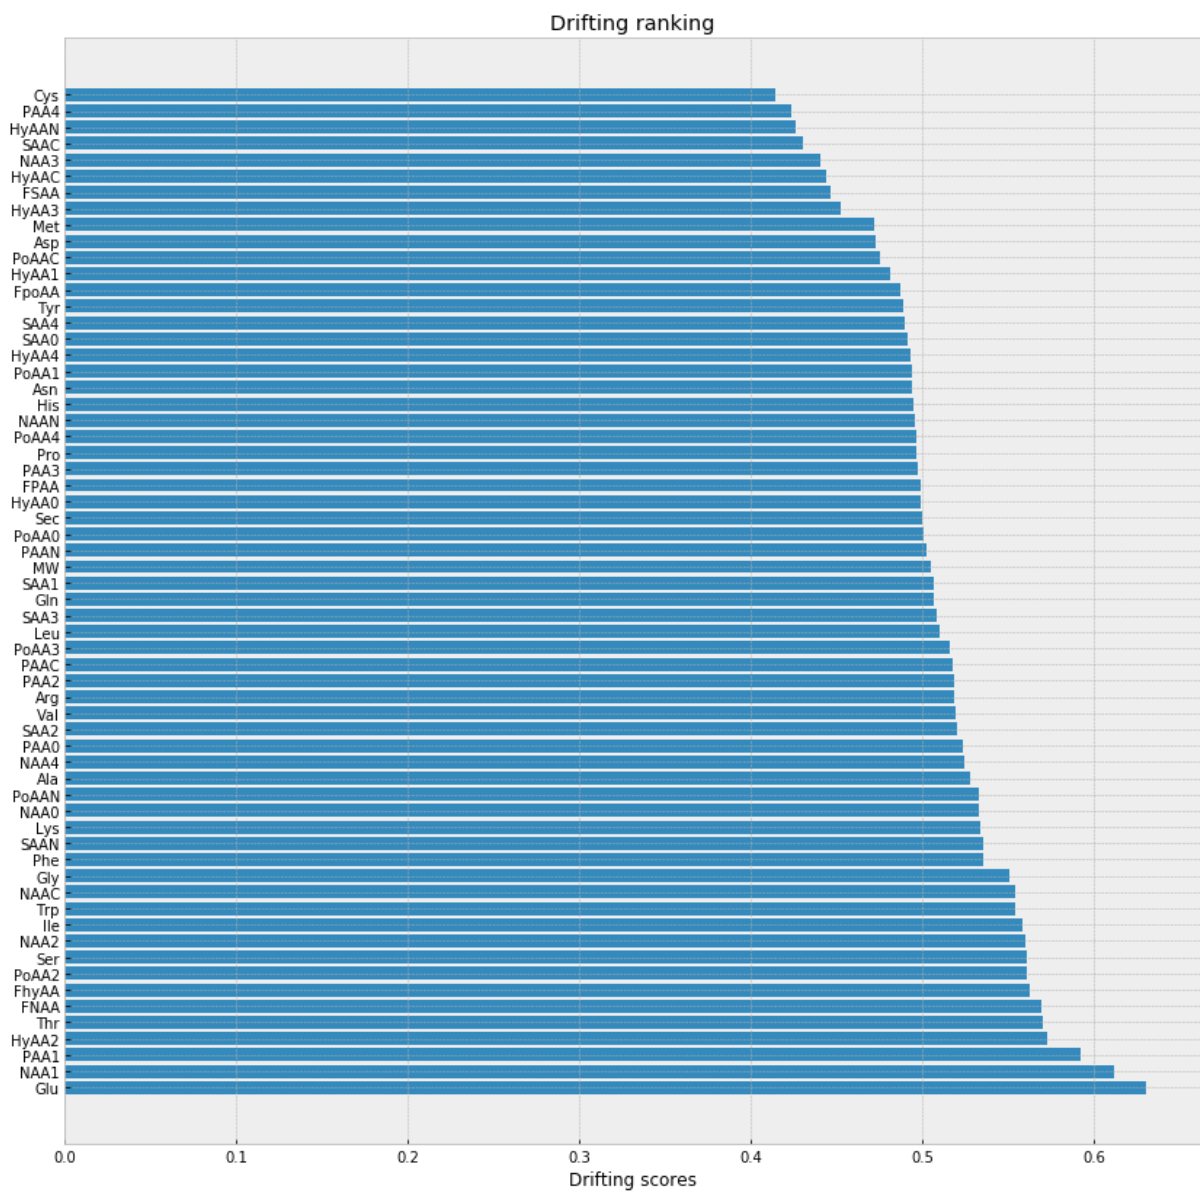

Fig. S2 Drifting ranking for features

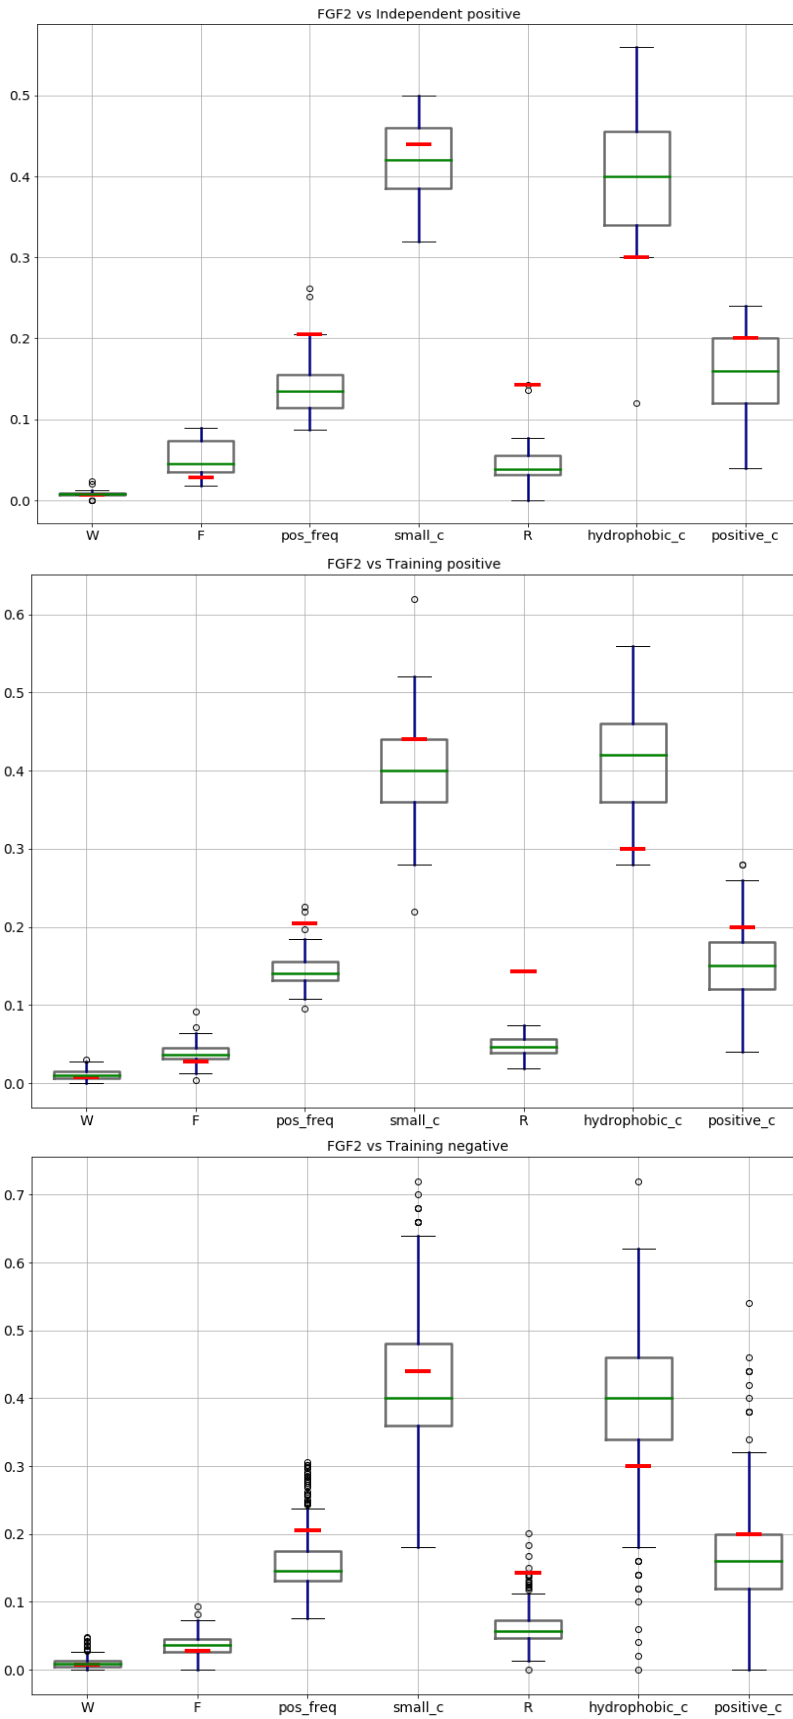

Fig. S3 The FGF2-Human's features (the red horizontal line) compare to the boxplot of features in different data sets. The y-axes stand for the values of the features on x-axes.

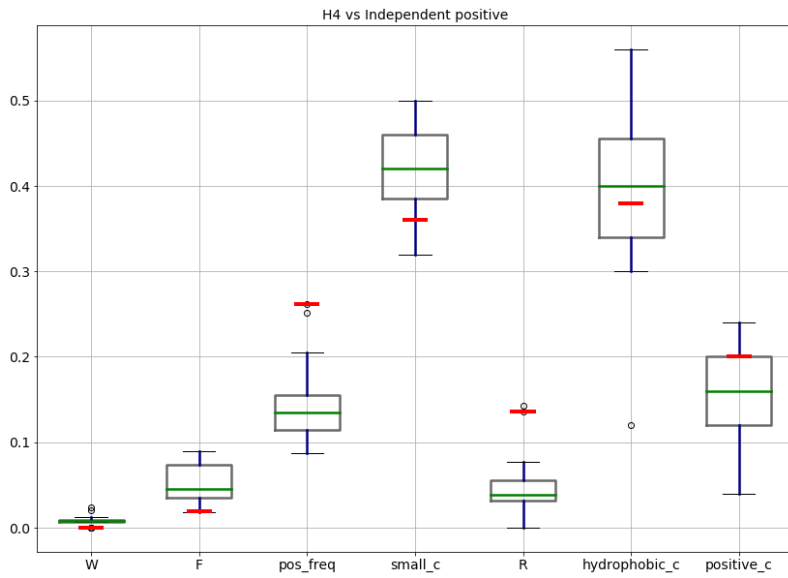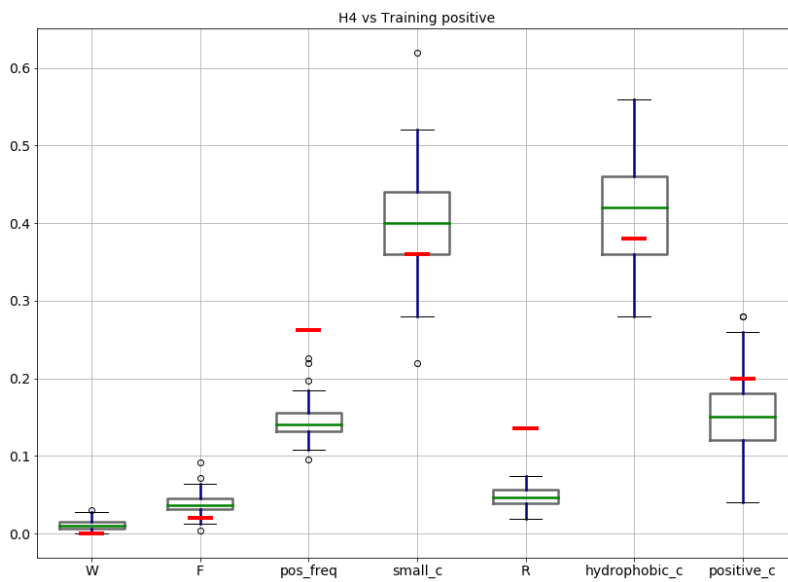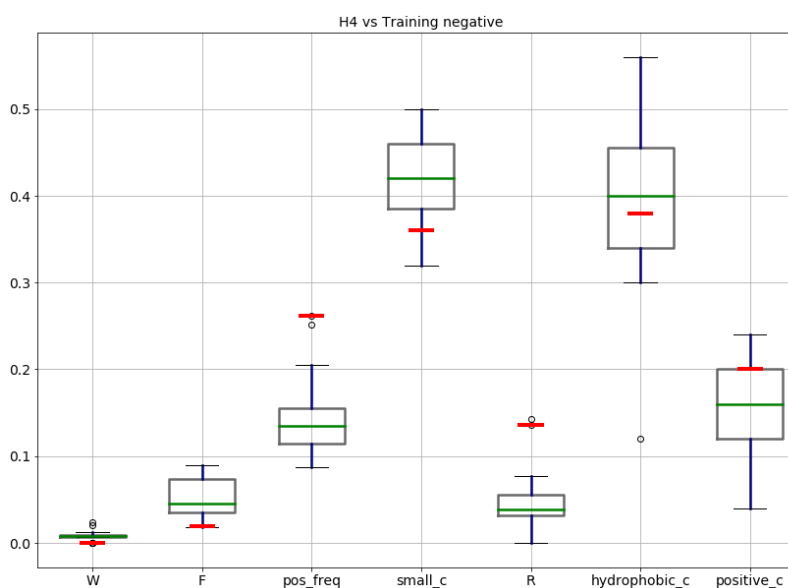

Fig. S4 The H4-Human's features (the red horizontal line) compare to the boxplot of features in different data sets

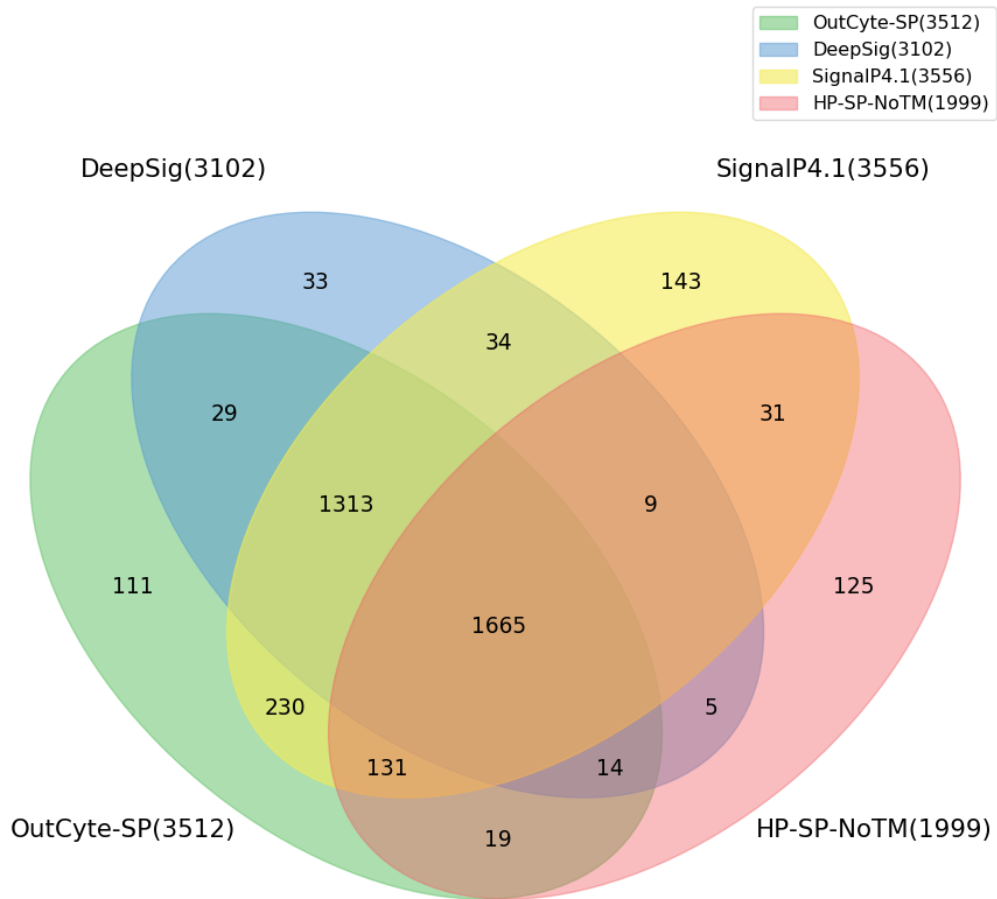

Fig. S5 Predictions of signal peptides within human proteins using different tools and databases (HP-SP-NoTM = signal peptide annotated in the UniProt database)..

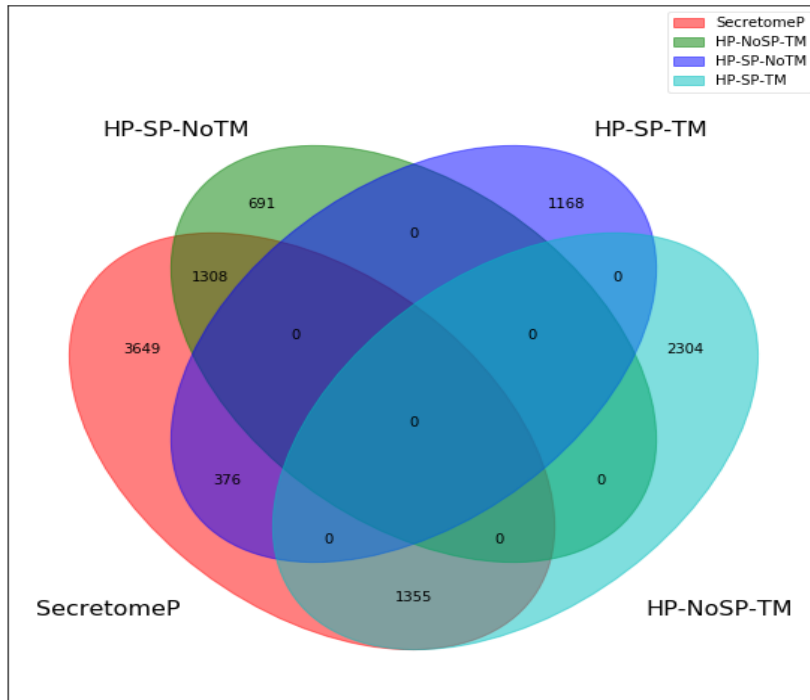

Fig. S6. The Venn diagram for SecretomeP prediction's intersection with three human proteome subgroups.

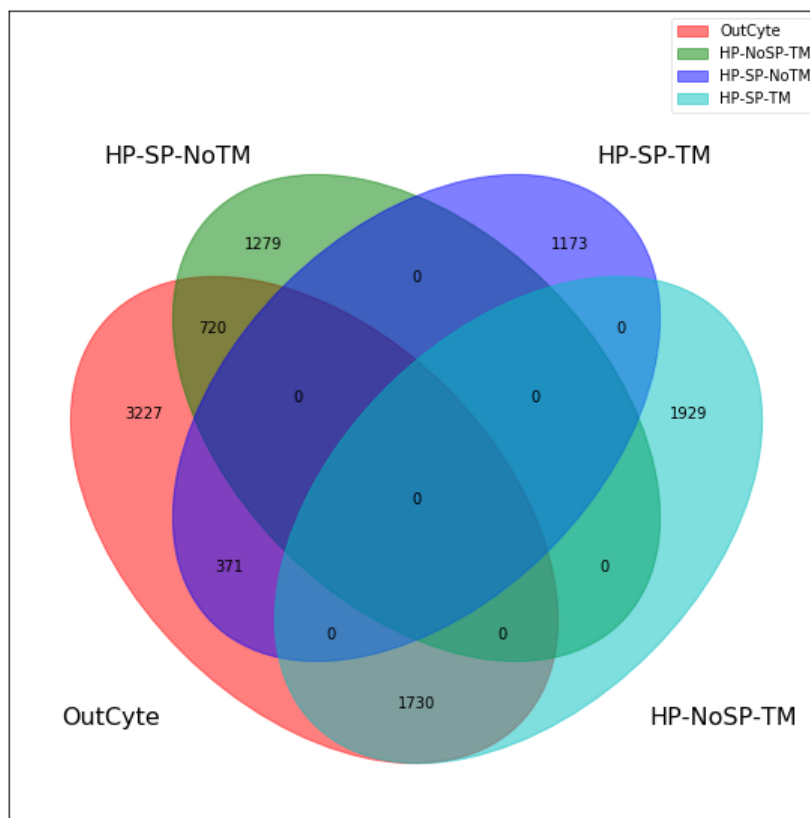

Fig. S7 The Venn diagram for OutCyte prediction's intersection with three human proteome subgroups.

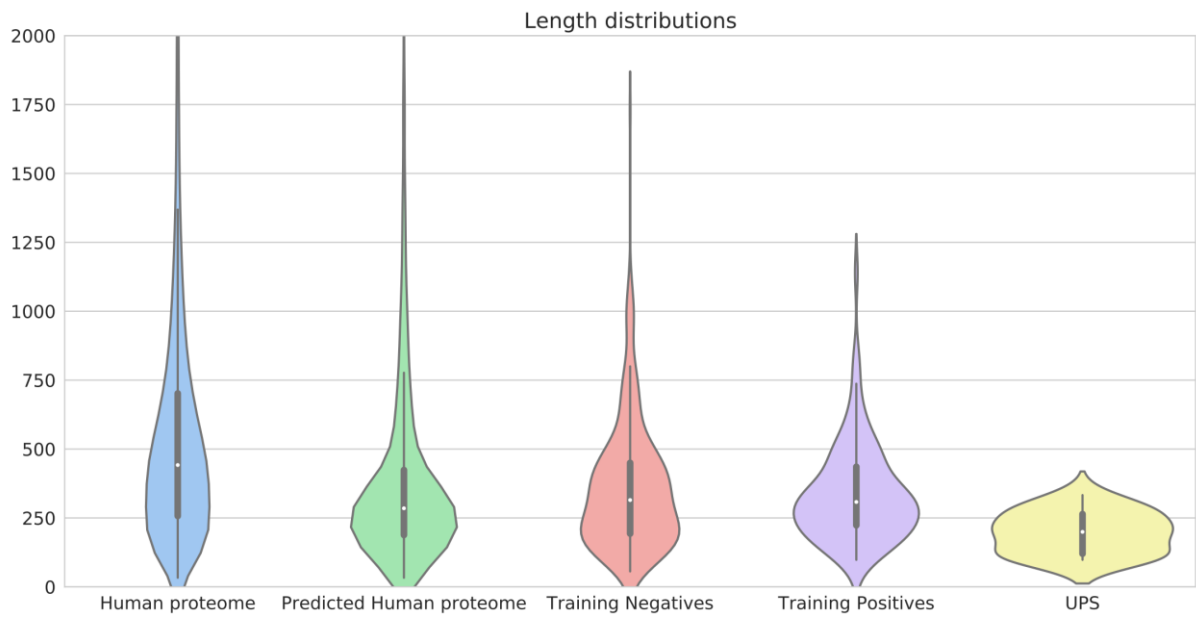

Fig. S8. Length distributions for datasets related to OutCyte-UPS

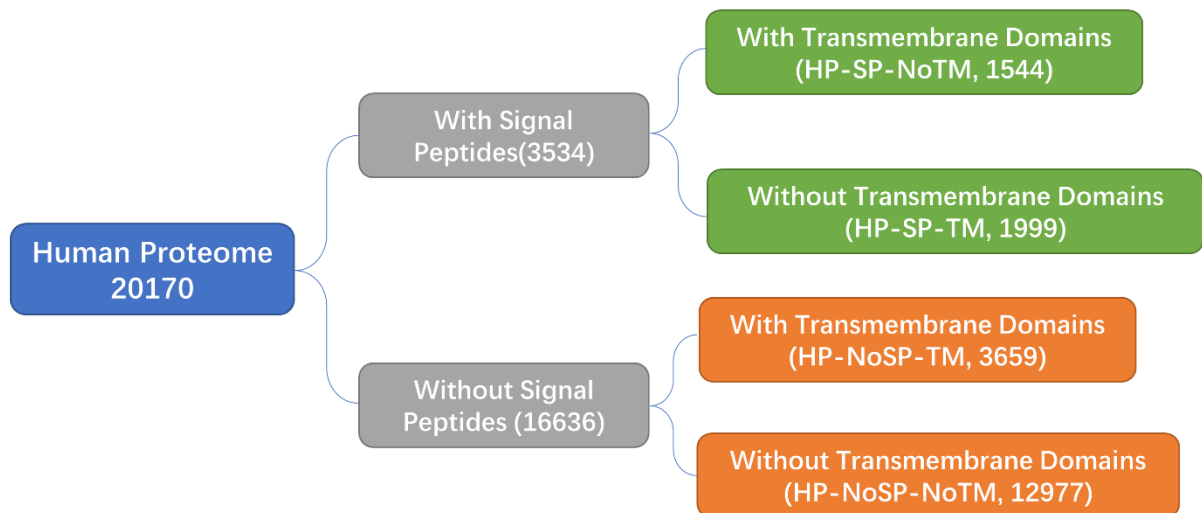

Fig. S9. Human proteome subgroups.

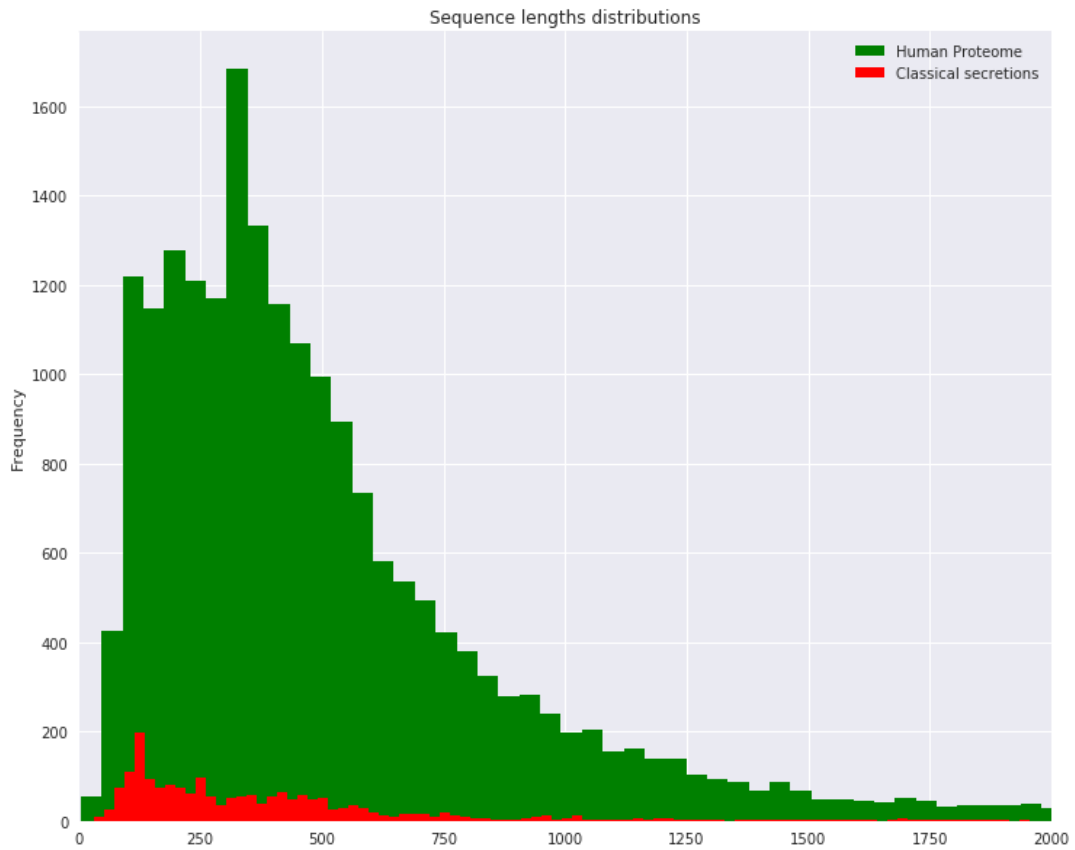

Fig. S10. The length distribution of human classical secretory proteins and human proteome, which showed the favor of smaller molecular in terms of secretion.

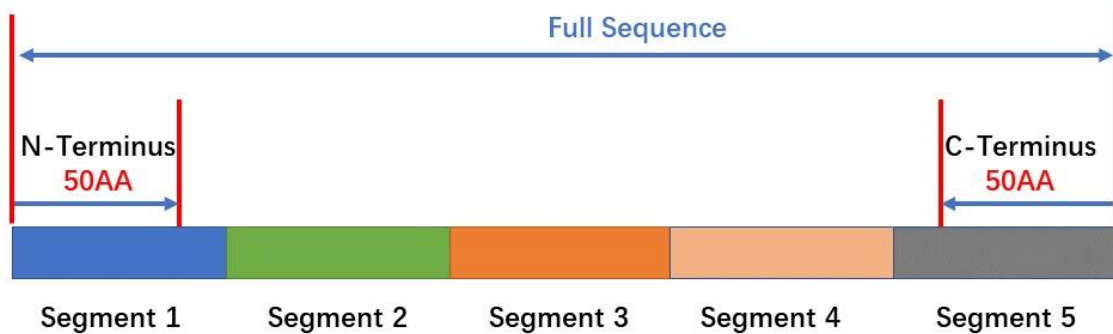

Fig. S11 Segmentations of sequences for generating positional physicochemical features



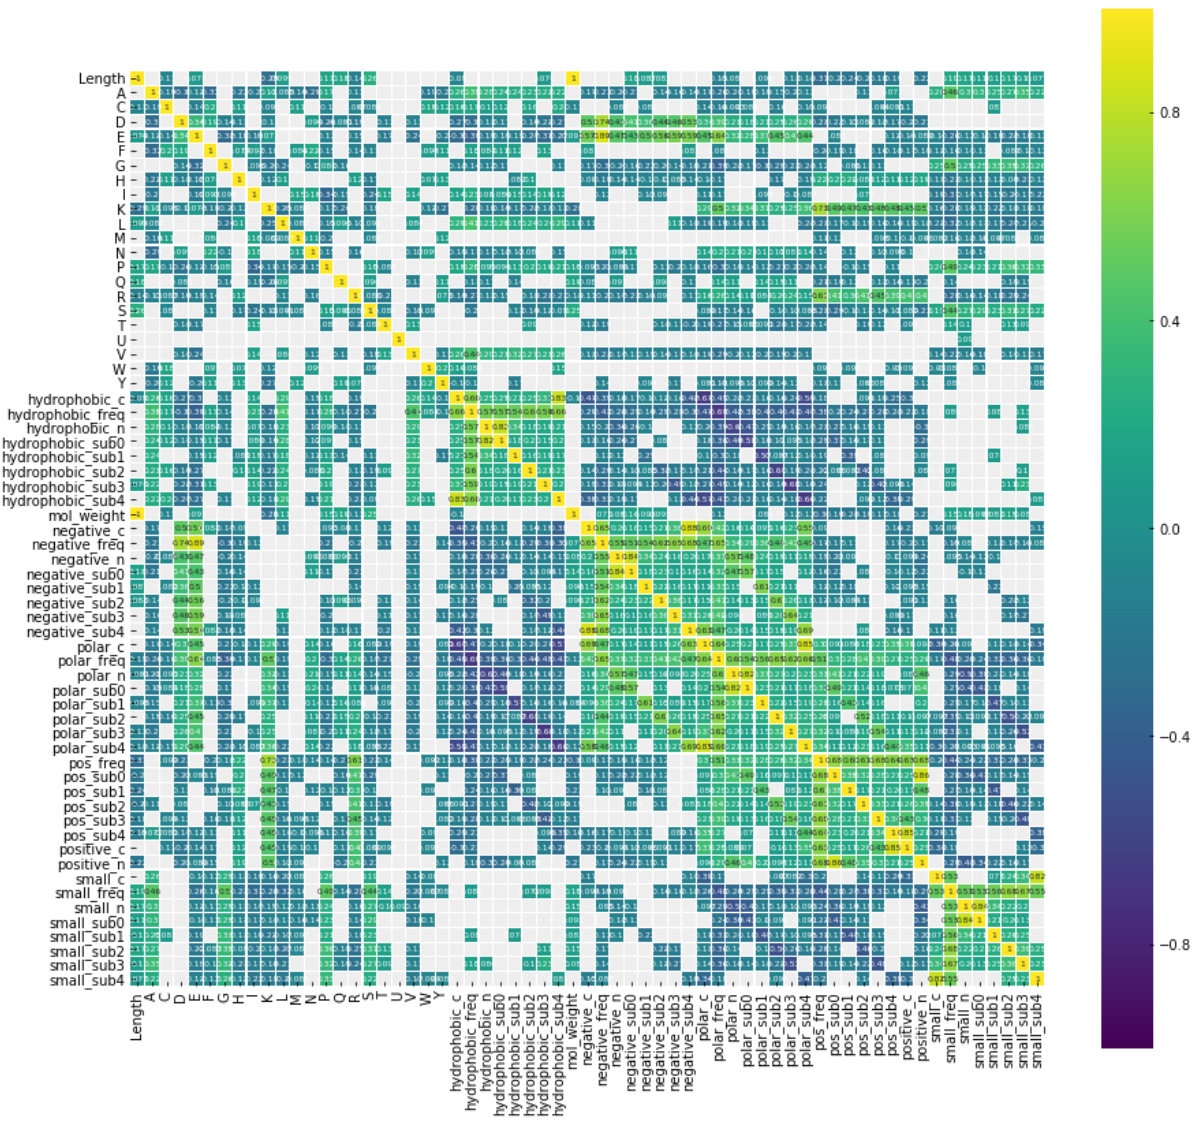

Fig. S12. The correlations of 61 features generated for building OutCyte-UPS.

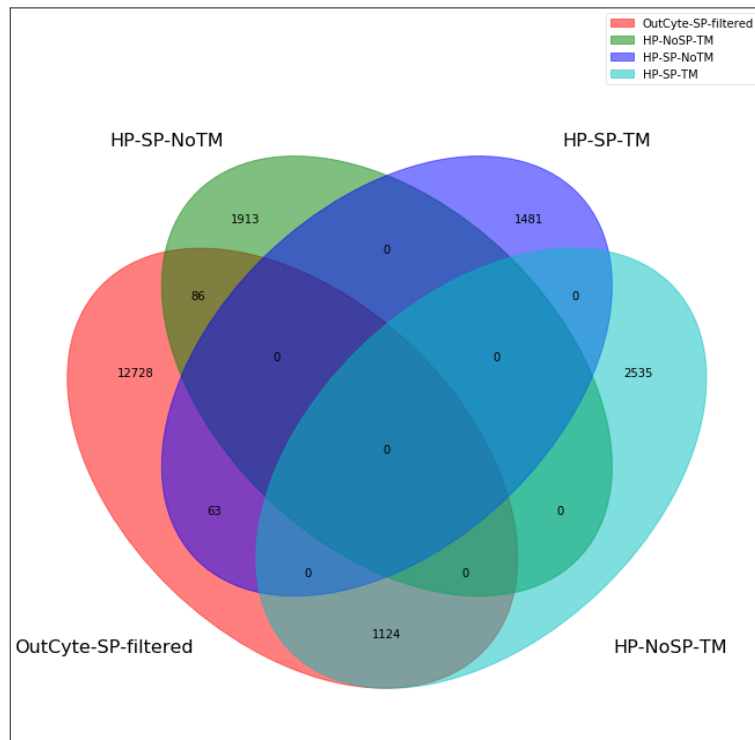

Fig. S13. The proteins without an N-terminal signal predicted by OutCyte-SP intersect with other human proteome subgroups. It shows the ability of OutCyte-SP to filter away proteins with N-terminal signals.

Table S1 List of 61 features for representing sequences

| <b>Size</b> | <b>Feature Names</b>                                                            | <b>Abbreviations</b>     |
|-------------|---------------------------------------------------------------------------------|--------------------------|
| 1           | Molecular Weights                                                               | MW                       |
| 20          | Amino acid frequencies of entire sequence                                       | Met, Cys, Trp, Phe ...   |
| 3           | Small amino acid frequencies of entire sequence, N- and C-terminus              | FSAA, SAAN, SAAC         |
| 3           | Positively charged amino acid frequencies of entire sequence, N- and C-terminus | FPAA, PAAN, PAAC         |
| 3           | Negatively charged amino acid frequencies of entire sequence, N- and C-terminus | FNAA, NAAN, NAAC         |
| 3           | Polar amino acid frequencies of entire sequence, N- and C-terminus              | FPoAA, PoAAN, PoAAC      |
| 3           | Hydrophobic amino acid frequencies of entire sequence, N- and C-terminus        | FHyAA, HyAAN, HyAAC      |
| 5           | Positively charged amino acid frequencies of 5 sequence segments                | PAA1, PAA2, ..., PAA5    |
| 5           | Negatively charged amino acid frequencies of 5 sequence segments                | NAA1, NAA2, ..., NAA5    |
| 5           | Polar amino acid frequencies of 5 sequence segments                             | PoAA1, PoAA2, ..., PoAA5 |
| 5           | Hydrophobic amino acid frequencies of 5 sequence segments                       | HyAA1, HyAA2, ..., HyAA5 |
| 5           | Small amino acid frequencies of 5 sequence segments                             | SAA1, SAA2, ..., SAA5    |

Table S2 Predictions on known UPS

| <b>Protein</b>          | <b>UniProt ID</b> | <b>OutCyte-UPS</b> | <b>SecretomeP</b> | <b>SRTpred</b> |
|-------------------------|-------------------|--------------------|-------------------|----------------|
| <b>FGF1-Human</b>       | P05230            | 0.616(+)           | 0.847(+)          | -0.81(-)       |
| <b>FGF2-Human</b>       | P09038            | 0.066(-)           | 0.239(-)          | 0.8(+)         |
| <b>IL1B- Human</b>      | P01584            | 0.598(+)           | 0.610(+)          | 0.96(+)        |
| <b>IL1A- Human</b>      | P01583            | 0.615(+)           | 0.551(-)          | -0.2(-)        |
| <b>LEG3-Human</b>       | P17931            | 0.618(+)           | 0.770(+)          | -1.16(-)       |
| <b>MIF-Human</b>        | P14174            | 0.584(+)           | 0.776(+)          | -0.91(-)       |
| <b>S10A4-Human</b>      | P26447            | 0.614(+)           | 0.724(+)          | -0.55(-)       |
| <b>GSTP1-Human</b>      | P09211            | 0.598(+)           | 0.545(-)          | -0.7(-)        |
| <b>PRDX1-Human</b>      | Q06830            | 0.618(+)           | 0.528(-)          | -0.94(-)       |
| <b>IL18-Human</b>       | Q14116            | 0.614(+)           | 0.634(+)          | -1(-)          |
| <b>H4-Human</b>         | P62805            | 0.065(-)           | 0.408(-)          | -1.12(-)       |
| <b>S10A2-Human</b>      | P29034            | 0.614(+)           | 0.324(-)          | -0.48(-)       |
| <b>LEG1-Human</b>       | P09382            | 0.598(+)           | 0.345(-)          | -0.62(-)       |
| <b>THIO-Human</b>       | P10599            | 0.617(+)           | 0.370(-)          | 0.71(+)        |
| <b>CNTF-Human</b>       | P26441            | 0.571(+)           | 0.653(+)          | 0.02(+)        |
| <b>HME2-Human</b>       | P19622            | 0.525(+)           | 0.727(+)          | -1.39(-)       |
| <b>THTR-Human</b>       | Q16762            | 0.066(-)           | 0.616(+)          | -1.2(-)        |
| <b>HMGB1-<br/>Human</b> | P09429            | 0.499(-)           | 0.068(-)          | -1.2(-)        |

Table S3 Statistics of datasets for training and evaluating OutCyte-SP

|                            | <b>SP</b> | <b>TM</b> | <b>N/C</b> | <b>Globular</b> |
|----------------------------|-----------|-----------|------------|-----------------|
| <b>Training</b>            | 1361      | 913       | 4491       |                 |
| <b>Evaluation-SignalP4</b> | 609       | 939       | 1001       |                 |
| <b>Evaluation-DeepSig</b>  | 46        | 323       | 688        |                 |
| <b>Evaluation-SignalP5</b> | 211       |           |            | 7248            |

Table S4 Signal peptide prediction benchmarks

|                    | <b>OutCyte-SP</b> | <b>DeepSig</b> | <b>SignalP4.0</b> | <b>UniProt</b> |
|--------------------|-------------------|----------------|-------------------|----------------|
| <b>OutCyte-SP</b>  | 3512              | 3021           | 3339              | 2983           |
| <b>DeepSig</b>     |                   | 3102           | 3021              | 2739           |
| <b>SignalP 4.0</b> |                   |                | 3556              | 3009           |
| <b>UniProt</b>     |                   |                |                   | 3323           |
